# Supplementary material
Source: MDPI journal article supplement (https://www.mdpi.com/2311-7524/9/4/418)
Supplement: s1 [file s1]

**Table S2.** Correlations among 19 bioclimatic variables at ten *Micromeria croatica* populations. Lower diagonal matrix: correlation coefficients ( $r$ ). Upper diagonal matrix: corresponding  $p$ -values.

| Bioclimatic variable | Bio 1  | Bio 2  | Bio 4  | Bio 5  | Bio 6  | Bio 7  | Bio 8  | Bio 9  | Bio 10 |
|----------------------|--------|--------|--------|--------|--------|--------|--------|--------|--------|
| Bio1                 |        | *      | ns     | **     | ***    | ns     | *      | ***    | ***    |
| Bio2                 | 0.718  |        | ***    | ***    | ***    | ns     | ***    | ns     | **     |
| Bio3                 | 0.627  | 0.970  |        | ***    | **     | ns     | ***    | ns     | *      |
| Bio4                 | 0.776  | 0.971  | 0.894  |        | ***    | ns     | ***    | *      | **     |
| Bio5                 | 0.957  | 0.882  | 0.796  | 0.924  |        | ns     | ***    | ***    | ***    |
| Bio6                 | 0.335  | -0.407 | -0.460 | -0.300 | 0.058  |        | ns     | ns     | ns     |
| Bio7                 | 0.758  | 0.993  | 0.935  | 0.988  | 0.912  | -0.356 |        | ns     | **     |
| Bio8                 | 0.978  | 0.575  | 0.489  | 0.635  | 0.881  | 0.499  | 0.619  |        | ***    |
| Bio9                 | 0.996  | 0.769  | 0.682  | 0.823  | 0.976  | 0.264  | 0.806  | 0.961  |        |
| Bio10                | 0.996  | 0.769  | 0.682  | 0.823  | 0.976  | 0.264  | 0.806  | 0.961  | 1.000  |
| Bio11                | 0.908  | 0.388  | 0.320  | 0.445  | 0.752  | 0.669  | 0.429  | 0.972  | 0.875  |
| Bio12                | -0.728 | -0.806 | -0.829 | -0.766 | -0.803 | 0.107  | -0.795 | -0.682 | -0.770 |
| Bio13                | -0.653 | -0.844 | -0.865 | -0.795 | -0.772 | 0.263  | -0.831 | -0.582 | -0.704 |
| Bio14                | -0.688 | -0.274 | -0.304 | -0.285 | -0.552 | -0.585 | -0.276 | -0.772 | -0.678 |
| Bio15                | -0.101 | -0.686 | -0.702 | -0.606 | -0.352 | 0.813  | -0.664 | 0.043  | -0.169 |
| Bio16                | -0.653 | -0.833 | -0.858 | -0.783 | -0.767 | 0.246  | -0.819 | -0.587 | -0.704 |
| Bio17                | -0.809 | -0.697 | -0.713 | -0.680 | -0.810 | -0.155 | -0.694 | -0.804 | -0.834 |
| Bio18                | -0.809 | -0.697 | -0.713 | -0.680 | -0.810 | -0.155 | -0.694 | -0.804 | -0.834 |
| Bio19                | -0.690 | -0.665 | -0.716 | -0.598 | -0.708 | -0.042 | -0.645 | -0.692 | -0.717 |

Note: ns, non-significant; \*, significant at  $p < 0.05$ ; \*\*, significant at  $p < 0.01$ ; \*\*\*, significant at  $p < 0.001$ .

Table S2. Continuing.

| Bioclimatic variable | Bio 11 | Bio 12 | Bio 13 | Bio 14 | Bio 15 | Bio 16 | Bio 17 | Bio 18 | Bio 19 |
|----------------------|--------|--------|--------|--------|--------|--------|--------|--------|--------|
| Bio1                 | ***    | *      | *      | *      | ns     | *      | **     | **     | *      |
| Bio2                 | ns     | **     | **     | ns     | *      | **     | *      | *      | *      |
| Bio3                 | ns     | **     | **     | ns     | *      | **     | *      | *      | *      |
| Bio4                 | ns     | **     | **     | ns     | ns     | **     | *      | *      | ns     |
| Bio5                 | *      | **     | **     | ns     | ns     | **     | **     | **     | *      |
| Bio6                 | *      | ns     | ns     | ns     | **     | ns     | ns     | ns     | ns     |
| Bio7                 | ns     | **     | **     | ns     | *      | **     | *      | *      | *      |
| Bio8                 | ***    | *      | ns     | **     | ns     | ns     | **     | **     | *      |
| Bio9                 | ***    | **     | *      | *      | ns     | *      | **     | **     | *      |
| Bio10                | ***    | **     | *      | *      | ns     | *      | **     | **     | *      |
| Bio11                |        | ns     | ns     | **     | ns     | ns     | *      | *      | ns     |
| Bio12                | −0.564 |        | ***    | *      | ns     | ***    | ***    | ***    | ***    |
| Bio13                | −0.436 | 0.984  |        | ns     | *      | ***    | ***    | ***    | ***    |
| Bio14                | −0.830 | 0.668  | 0.534  |        | ns     | ns     | **     | **     | **     |
| Bio15                | 0.251  | 0.547  | 0.683  | −0.245 |        | *      | ns     | ns     | ns     |
| Bio16                | −0.445 | 0.988  | 1.000  | 0.552  | 0.668  |        | ***    | ***    | ***    |
| Bio17                | −0.739 | 0.957  | 0.895  | 0.849  | 0.286  | 0.903  |        | ***    | ***    |
| Bio18                | −0.739 | 0.957  | 0.895  | 0.849  | 0.286  | 0.903  | 1.000  |        | ***    |
| Bio19                | −0.626 | 0.965  | 0.923  | 0.767  | 0.409  | 0.932  | 0.963  | 0.963  |        |

Note: ns, non-significant; \*, significant at  $p < 0.05$ ; \*\*, significant at  $p < 0.01$ ; \*\*\*, significant at  $p < 0.001$ .
