# Supplementary material
Source: MDPI journal article supplement (https://www.mdpi.com/2311-7524/9/4/418)
Supplement: s1 [file s1]

**Table S1.** Values of 19 bioclimatic variables of ten *Micromeria croatica* populations from Croatia (Cr1–Cr5), Bosnia and Herzegovina (BH1–BH4), and Montenegro (Mn) obtained from the WorldClim database [39]. Temperature is expressed in °C, and precipitation in mm.

| No.   | Bioclimatic variable                | Cr1    | Cr2    | Cr3    | Cr4    | Cr5    | BH1    | BH2    | BH3    | BH4    | Mn     |
|-------|-------------------------------------|--------|--------|--------|--------|--------|--------|--------|--------|--------|--------|
| Bio1  | Annual Mean Temperature             | 4.02   | 7.43   | 6.97   | 8.94   | 8.59   | 11.66  | 9.35   | 8.63   | 10.86  | 5.29   |
| Bio2  | Mean Diurnal Range                  | 6.38   | 7.04   | 7.90   | 7.23   | 9.50   | 11.17  | 11.43  | 10.66  | 12.26  | 9.40   |
| Bio3  | Isothermality                       | 28.46  | 30.09  | 32.92  | 30.01  | 34.67  | 35.79  | 37.12  | 36.38  | 37.37  | 34.69  |
| Bio4  | Temperature Seasonality             | 608.85 | 602.60 | 613.07 | 630.17 | 675.89 | 725.10 | 716.28 | 690.47 | 740.76 | 652.47 |
| Bio5  | Max Temperature of Warmest Month    | 15.50  | 18.50  | 18.60  | 20.70  | 21.70  | 26.10  | 23.60  | 22.30  | 25.80  | 18.40  |
| Bio6  | Min Temperature of Coldest Month    | −6.90  | −4.90  | −5.40  | −3.40  | −5.70  | −5.10  | −7.20  | −7.00  | −7.00  | −8.70  |
| Bio7  | Temperature Annual Range            | 22.40  | 23.40  | 24.00  | 24.10  | 27.40  | 31.20  | 30.80  | 29.30  | 32.80  | 27.10  |
| Bio8  | Mean Temperature of Wettest Quarter | 1.15   | 4.78   | 4.02   | 6.13   | 5.05   | 7.53   | 5.40   | 4.93   | 6.50   | 2.30   |
| Bio9  | Mean Temperature of Driest Quarter  | 11.67  | 15.23  | 14.88  | 17.15  | 17.15  | 20.37  | 18.02  | 17.07  | 19.72  | 13.57  |
| Bio10 | Mean Temperature of Warmest Quarter | 11.67  | 15.23  | 14.88  | 17.15  | 17.15  | 20.37  | 18.02  | 17.07  | 19.72  | 13.57  |
| Bio11 | Mean Temperature of Coldest Quarter | −3.08  | 0.67   | 0.18   | 1.90   | 0.57   | 2.40   | 0.35   | 0.07   | 1.33   | −2.37  |
| Bio12 | Annual Precipitation                | 1934   | 1519   | 1473   | 1230   | 1160   | 1050   | 1081   | 1085   | 1124   | 1130   |
| Bio13 | Precipitation of Wettest Month      | 238    | 194    | 188    | 161    | 146    | 125    | 129    | 130    | 134    | 124    |
| Bio14 | Precipitation of Driest Month       | 89     | 68     | 65     | 53     | 56     | 63     | 67     | 67     | 65     | 73     |
| Bio15 | Precipitation Seasonality           | 25.17  | 26.95  | 27.16  | 28.75  | 25.40  | 20.02  | 19.28  | 19.28  | 20.84  | 14.61  |
| Bio16 | Precipitation of Wettest Quarter    | 648    | 521    | 506    | 429    | 390    | 338    | 346    | 347    | 364    | 334    |
| Bio17 | Precipitation of Driest Quarter     | 359    | 274    | 264    | 214    | 211    | 207    | 221    | 223    | 216    | 242    |
| Bio18 | Precipitation of Warmest Quarter    | 359    | 274    | 264    | 214    | 211    | 207    | 221    | 223    | 216    | 242    |
| Bio19 | Precipitation of Coldest Quarter    | 483    | 344    | 330    | 282    | 294    | 269    | 276    | 275    | 294    | 277    |
